# Supplementary material for: Grape Seed Proanthocyanidin Extract Prevents Bone Loss via Regulation of Osteoclast Differentiation, Apoptosis, and Proliferation
Source: MDPI journal article supplement (doi:10.3390/nu12103164), 2020-10-16
Supplement: s1 [file s1]

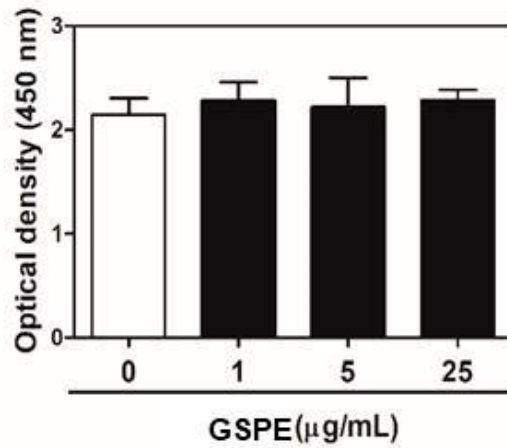

**Figure S1.** BMMs were cultured for 3 days at the indicated doses of GSPE in the presence of M-CSF (30 ng/mL). Cytotoxicity was determined by XTT assay.

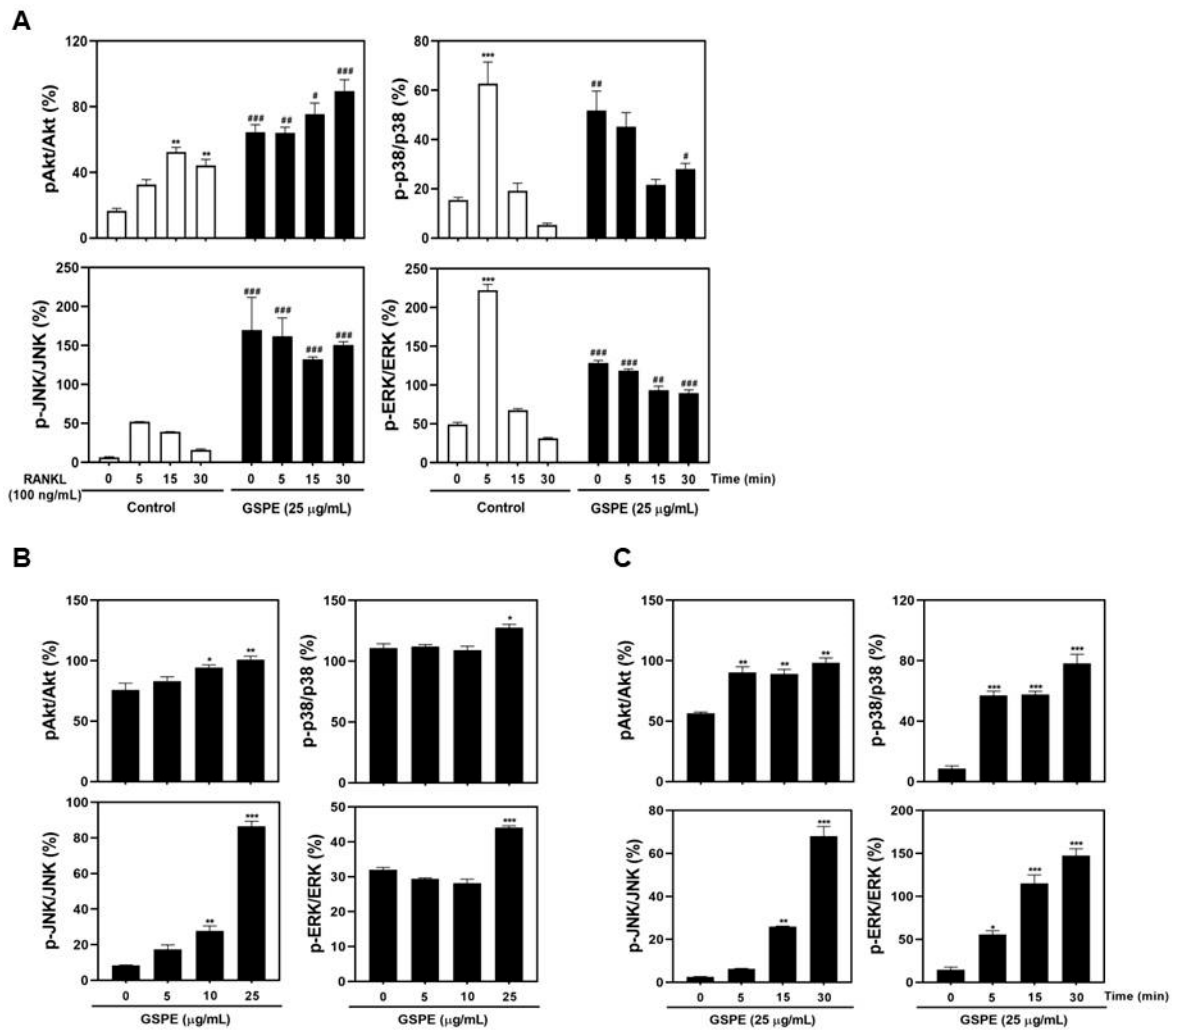

**Figure S2.** The graph indicates the phosphoprotein-to-total protein ratios of each molecule in Figure 5A, B, and C. Quantification of relative ratio of band intensity was performed using Image J software. The phosphoprotein-to-total protein ratios (%) are represented as the mean  $\pm$  standard deviation. \*\**p*

< 0.01, \*\*\* $p$  < 0.001 versus Control at 0 min or 0  $\mu\text{g}/\text{mL}$ ; \* $p$  < 0.05, \*\* $p$  < 0.01, \*\*\* $p$  < 0.001 versus Control at each time.

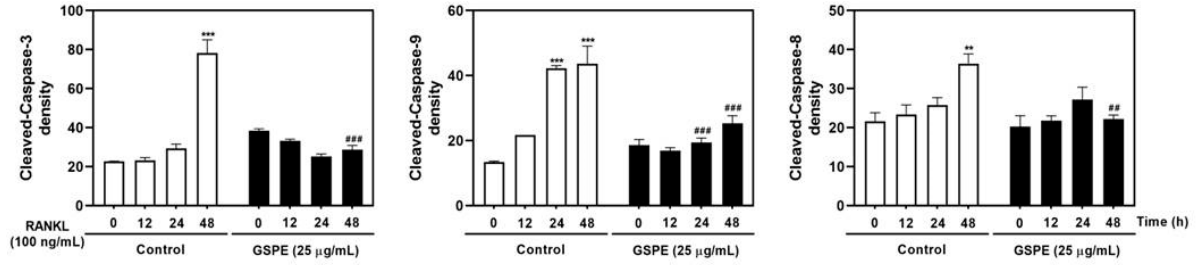

**Figure S3.** The graph indicates density of the cleaved-caspase-3, -9, and -8 bands. Quantification of band intensity was performed using Image J software. The band intensity is represented as the mean  $\pm$  standard deviation. \*\* $p$  < 0.01, \*\*\* $p$  < 0.001 versus Control at 0 h; \* $p$  < 0.05, \*\* $p$  < 0.01, \*\*\* $p$  < 0.001 versus Control at each time.
